# Supplementary material
Source: MDPI journal article supplement (https://www.mdpi.com/2076-3417/7/7/657)
Supplement: s1 [file s1]

## Sheet: Arkusz1
	exposure time [µs]	point distance [µm]	scanning speed [mm/s]	laser power [W]	hatch distance [mm]	energy density [J/mm3]
I	40	20	500	50	0.035	57.1429
II	40	20	500	60	0.035	68.5714
III	40	20	500	70	0.035	80
IV	40	20	500	80	0.035	91.4286
V	40	20	500	95	0.035	108.571
VI	40	20	500	97.5	0.035	111.429
VII	40	20	500	105	0.035	120
VIII	40	20	500	75	0.05	60
IX	40	20	500	85	0.05	68
X	40	20	500	95	0.05	76
XI	40	20	500	110	0.05	88
XII	40	20	500	120	0.05	96
XIII	60	20	333.333	75	0.037	121.622
XIV	60	20	333.333	75	0.04	112.5
XV	60	20	333.333	75	0.045	100
XVI	60	20	333.333	75	0.05	90
XVII	60	20	333.333	75	0.055	81.8182
XVIII	60	20	333.333	75	0.065	69.2308
XIX	60	20	333.333	75	0.075	60
XX	60	20	333.333	100	0.05	120
XXI	60	20	333.333	100	0.055	109.091
XXII	60	20	333.333	100	0.06	100
XXIII	60	20	333.333	100	0.065	92.3077
XIV	60	20	333.333	100	0.075	80
XXV	60	20	333.333	100	0.085	70.5882
XXVI	60	20	333.333	100	0.095	63.1579
